# Supplementary material
Source: PubMed Central journal article supplement (PMC3707658)
Supplement: supp_M113.468066_jbc.M113.468066-1.pdf [file supp_M113.468066_jbc.M113.468066-1.pdf]

**Table S1: Integration data for CE traces shown in Figure 3.**

The peaks are shown in order of appearance on CE electrophoregrams. The data represent the area of each peak in percentage of the total area of all the sugar-nucleotides present in the reaction. The degradation product P2 was excluded from these calculations due to its poor resolution from NADPH. Errors on peak integration are ~ 2%. The “i” denotes the impurity peak.

| Trace          | Enzymes   | P5 $\gamma$ | P4 $\gamma$ | P1   | P5 $\alpha$ | P4 $\beta$ | P4 $\alpha$ | i   |
|----------------|-----------|-------------|-------------|------|-------------|------------|-------------|-----|
| <b>Panel A</b> |           |             |             |      |             |            |             |     |
| d              | b + DdahC | 0           | 21.0        | 26.2 | 6.6         | 22.1       | 16.6        | 7.6 |
| c              | b + MlghC | 59.7        | 10.6        | 14.5 | 0           | 0          | 7.9         | 7.3 |
| b              | a + MlghB | 0           | 25.6        | 31.8 | 0           | 19.5       | 17.5        | 5.6 |
| a              | P1 only   | 0           | 0           | 94.5 | 0           | 0          | 0           | 5.6 |
| <b>Panel B</b> |           |             |             |      |             |            |             |     |
| d              | b + DdahC | 0           | 0           | 61.5 | 12.9        | 0          | 19.5        | 6.1 |
| c              | b + MlghC | 0           | 0           | 74.4 | 0           | 0          | 19.5        | 6.1 |
| b              | a + DdahB | 0           | 0           | 71.5 | 0           | 0          | 23.7        | 4.9 |
| a              | P1 only   | 0           | 0           | 94.5 | 0           | 0          | 0           | 5.6 |

**Table S2: Integration data for CE traces shown in Figure 4.**

The peaks are shown in order of appearance on CE electrophoregrams. The data represent the area of each peak in percentage of the total area of all the sugar-nucleotides present in the reaction. The degradation product P2 was excluded from these calculations due to its poor resolution from NADPH. Errors on peak integration are ~ 2%.

| Trace          | Enzymes                    | P5 $\gamma$ | P4 $\gamma$ | P3   | P1   | P5 $\alpha$ | P4 $\beta$ | P4 $\alpha$ |
|----------------|----------------------------|-------------|-------------|------|------|-------------|------------|-------------|
| <b>Panel A</b> |                            |             |             |      |      |             |            |             |
| e              | a + MlghC                  | 40.0        | 0           | 0    | 34.4 | 0           | 18.1       | 7.6         |
| d              | a + WcaG <sub>NCTC</sub>   | 0           | 34.2        | 6.3  | 28.8 | 0           | 20.8       | 9.9         |
| c              | a + DdahC                  | 0           | 34.6        | 0    | 33.1 | 8.8         | 20.7       | 2.8         |
| b              | a + WcaG <sub>81176</sub>  | 0           | 34.0        | 13.2 | 23.6 | 0           | 20.5       | 8.8         |
| a              | P1, P4 $\alpha\beta\gamma$ | 0           | 35.0        | 0    | 35.7 | 0           | 20.7       | 8.7         |
| <b>Panel B</b> |                            |             |             |      |      |             |            |             |
| g              | e + WcaG <sub>NCTC</sub>   | 58.8        | 0           | 41.2 | 0    | 0           | 0          | 0           |
| f              | d + WcaG <sub>NCTC</sub>   | 0           | 0           | 51.2 | 17.7 | 0           | 20.3       | 10.9        |
| e              | d + MlghC                  | 100         | 0           | 0    | 0    | 0           | 0          | 0           |
| d              | a + MlghB                  | 0           | 23.5        | 0    | 30.6 | 0           | 28.7       | 17.2        |
| c              | b + MlghC                  | 0           | 0           | 54.3 | 45.7 | 0           | 0          | 0           |
| b              | a + WcaG <sub>NCTC</sub>   | 0           | 0           | 46.6 | 53.4 | 0           | 0          | 0           |
| a              | baseline                   | 0           | 0           | 0    | 100  | 0           | 0          | 0           |

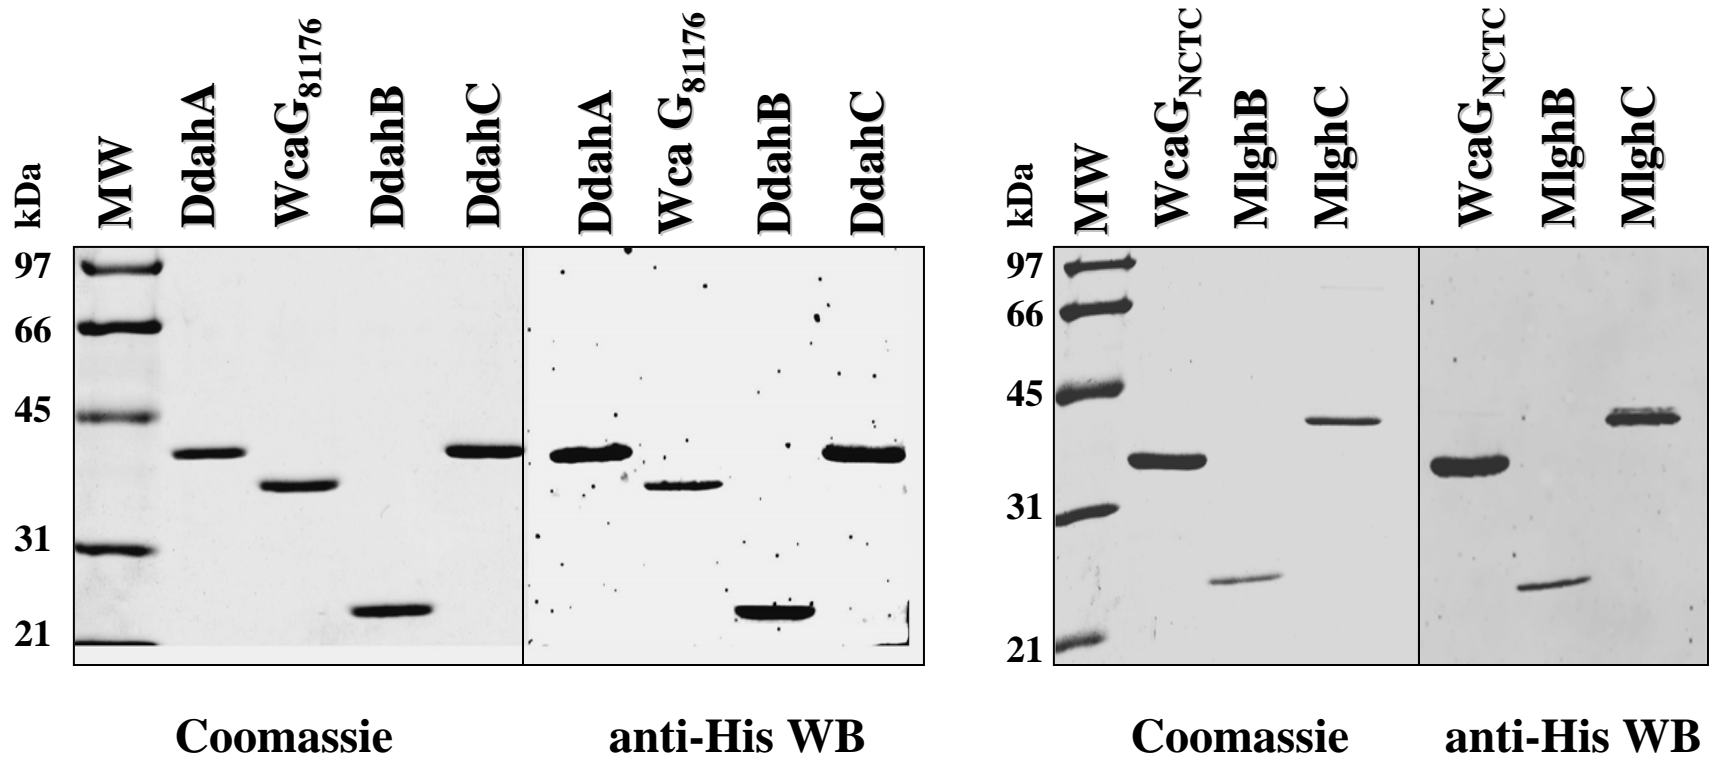

**Figure S1: SDS-PAGE analysis of all purified enzymes used in this study.** The proteins were purified by nickel affinity chromatography. Detection was performed with Coomassie staining and anti-histidine tag Western blotting (WB). MlghB and DdghB migrated at a higher molecular weight than expected but their identity was confirmed by MALDI-MS (This study and (25)). All other enzymes migrated at their expected molecular weight. MW: Molecular weight.
